1 A new method for counting reproductive structures in  
2 digitized herbarium specimens using Mask R-CNN

3 Charles Davis<sup>1,\*</sup>, Julien Champ<sup>2</sup>, Daniel S. Park<sup>1</sup>, Ian Breckheimer<sup>1</sup>, Goia  
4 M. Lyra<sup>1,3</sup>, Junxi Xie<sup>1</sup>, Alexis Joly<sup>2,\*</sup>, Dharmesh Tarapore<sup>4</sup>, Aaron M.  
5 Ellison<sup>5</sup>, and Pierre Bonnet<sup>6,7</sup>

6 <sup>1</sup>Harvard University, Department of Organismic and Evolutionary Biology,  
7 Harvard University Herbaria, Cambridge, Massachusetts, USA

8 <sup>2</sup>LIRMM, Inria, University of Montpellier, France

9 <sup>3</sup>UFBA, Universidade Federal da Bahia, Salvador, Bahia, Brazil

10 <sup>4</sup>Boston University, Department of Computer Science, Boston,  
11 Massachusetts, USA

12 <sup>5</sup>Harvard University, Harvard Forest, Petersham, Massachusetts, USA

13 <sup>6</sup>CIRAD, UMR AMAP, F-34398 Montpellier, France

14 <sup>7</sup>AMAP, Univ Montpellier, CIRAD, CNRS, INRAE, IRD, Montpellier,  
15 France

16 \*Corresponding authors: [cdavis@oeb.harvard.edu](mailto:cdavis@oeb.harvard.edu); [alexis.joly@inria.fr](mailto:alexis.joly@inria.fr)

17 June 25, 2020

18

## Abstract

19

20

21

22

23

24

25

26

27

28

29

30

31

32

33

34

35

36

37

38

39

40

41

42

43

44

Phenology—the timing of life-history events—is a key trait for understanding responses of organisms to climate. The digitization and online mobilization of herbarium specimens is rapidly advancing our understanding of plant phenological response to climate and climatic change. The current practice of manually harvesting data from individual specimens, however, greatly restricts our ability to scale-up data collection. Recent investigations have demonstrated that machine-learning approaches can facilitate this effort. However, present attempts have focused largely on simplistic binary coding of reproductive phenology (e.g., presence/absence of flowers). Here, we use crowd-sourced phenological data of buds, flowers, and fruits from > 3000 specimens of six common wildflower species of the eastern United States (*Anemone canadensis* L., *A. hepatica* L., *A. quinquefolia* L., *Trillium erectum* L., *T. grandiflorum* (Michx.) Salisb., and *T. undulatum* Wild.) to train models using Mask R-CNN to segment and count phenological features. A single global model was able to automate the binary coding of each of the three reproductive stages with > 87% accuracy. We also successfully estimated the relative abundance of each reproductive structure on a specimen with  $\geq 90\%$  accuracy. Precise counting of features was also successful, but accuracy varied with phenological stage and taxon. Specifically, counting flowers was significantly less accurate than buds or fruits likely due to their morphological variability on pressed specimens. Moreover, our Mask R-CNN model provided more reliable data than non-expert crowd-sourcers but not botanical experts, highlighting the importance of high-quality human training data. Finally, we also demonstrated the transferability of our model to automated phenophase detection and counting of the three *Trillium* species, which have large and conspicuously-shaped reproductive organs. These results highlight the promise of our two-phase crowd-sourcing and machine-learning pipeline to segment and count reproductive features of herbarium specimens, thus providing high-quality data with which to investigate plant response to ongoing climatic change.

## 1 Keywords:

automated regional segmentation, deep learning, digitized herbarium specimen, plant phenology, regional convolutional neural network, reproductive structures, visual data classification.

## 2 Introduction

Climate change is a potent selective force that is shifting the geographic ranges of genotypes, altering population dynamics of individual species, and reorganizing entire assemblages in all environments. A key functional trait in this regard is phenology: the timing of life-history events, such as the onset of flowering or migration. The use of museum specimens has invigorated and enriched the investigation of phenological responses to climatic change, and is one of several research directions that has brought a renewed sense of purpose and timeliness to natural history collections (Meineke et al., 2018, 2019; Willis et al., 2017; Davis et al., 2015; Hedrick et al., 2020). Herbarium specimens greatly expand the historical depth, spatial scale, and species diversity of phenological observations relative to those available from field observations (Wolkovich et al., 2014). In many cases, herbarium specimens provide the only means of assessing phenological responses to climatic changes occurring over decades to centuries (Davis et al., 2015). However, a great challenge in using these specimens is accessing and rapidly assessing phenological state(s) of the world's estimated 393 million herbarium specimens (Thiers, 2017; Sweeney et al., 2018).

The ongoing digitization and online mobilization of herbarium specimens has facilitated their broad access with significant economies of scale (Nelson and Ellis, 2019; Sweeney et al., 2018; Hedrick et al., 2020) and accelerated advances in scientific investigations, including phenological assessment efforts that were underway prior to mass digitization (Davis et al., 2015; Miller-Rushing et al., 2006; Primack et al., 2004). Digitization 2.0 (*sensu* Hedrick et al., 2020) has also sparked the integration and development of new scholarly disciplines and lines of inquiry not possible previously. Whereas Digitization 1.0 refers to the generation of digitized products from physical specimens, Digitization 2.0 is the use of natural history

71 collections to answer scientific questions using only their digitized representation, rather than  
72 the physical specimen itself.

73 In recent years, scientists have used these digitized herbarium specimens in novel ways  
74 (*e.g.*, [Meineke et al., 2018, 2019](#); [Hedrick et al., 2020](#)) and greatly increased the pace at  
75 which key phenological trait data can be harvested from tens of thousands of specimens.  
76 *CrowdCurio–Thoreau’s Field Notes* ([Willis et al., 2017](#)) was one of the first attempts to move  
77 beyond the standard practice of coding phenology of herbarium specimens using binary (pres-  
78 ence/absence) coding (*e.g.*, specimen A has flowers, specimen B has fruits: [Miller-Rushing](#)  
79 [et al., 2006](#); [Primack et al., 2004](#)). Many of these efforts have also focused largely on flow-  
80 ering, ignoring other key phenophases. Rather, users of *CrowdCurio* use a crowd-sourcing  
81 pipeline to score and quantify all phenophase features—bud, flowers, and fruits—for each spec-  
82 imen processed. This pipeline has facilitated the first development of ratio-based approaches  
83 to quantitatively assess the early, peak, and terminal phenophases from herbarium specimens  
84 and determine phenological changes within and between seasons ([Love et al., 2019](#); [Williams](#)  
85 [et al., 2017](#)). The recent large-scale deployment of the *CrowdCurio* pipeline on Amazon’s  
86 Mechanical Turk has demonstrated the power and scale of such fine-grained phenophasing  
87 to understand latitudinal variation in phenological responses ([Park et al., 2019](#)).

88 Despite the great promise of crowd-sourcing for phenophase detection, it is still time-  
89 consuming and can become cost-prohibitive to process entire collections spanning whole  
90 continents. Machine-learning approaches have the potential to open up new opportunities  
91 for phenological investigation in the era of Digitization 2.0 ([Pearson et al., 2020](#)). Recent  
92 efforts ([Lorieul et al., 2019](#)) have demonstrated that fully automated machine-learning meth-  
93 ods—and deep learning approaches based on convolutional neural networks in particular—can  
94 determine the presence of a fruit or flower in a specimen with > 90% accuracy. Convolutional  
95 neural networks were proven effective at predicting all phenophases of a specimen, based on  
96 classification of nine phenological categories. These predictions, estimated from proportions  
97 of buds, flowers and fruits, reach an accuracy (true positive rate) > 43%, which is equiva-

98 lent to the capability of human experts (Lorieul et al., 2019). This large-scale automated  
99 phenophase estimation, based on an annotation method developed by Pearson (2019), was  
100 tested on species belonging to a particularly difficult taxon (*i.e.*, the Asteraceae family), for  
101 which visual analysis of numerous and tiny reproductive structures is known to be visually  
102 challenging. This work demonstrated the potential of deep learning technologies to esti-  
103 mate fine-grained phenophases, but further improvements are needed to support ecological  
104 investigation of diverse taxa.

105 Although Pearson (2019) successfully determined reproductive status (*i.e.*, fertile *vs.*  
106 sterile specimens), neither the precise location (*i.e.*, image segment) nor the number of  
107 phenofeatures present on a specimen was quantified (Lorieul et al., 2019). A quantitative  
108 machine-learning approach would have the value and impact that *CrowdCurio* has already  
109 achieved, but could be scaled-up in speed and cost-effectiveness. A recent proof-of-concept  
110 study (Goëau et al., in press) used human-scored data to train and test a model using  
111 instance segmentation with Mask R-CNN (Masked Region-based Convolutional Neural Net-  
112 work: He et al., 2017) to locate and count phenological features of *Streptanthus tortuosus*  
113 Kellogg (Brassicaceae). This assessment clarified several determinants of model success for  
114 identifying and counting phenological features, including: the type of masking applied to  
115 human annotations; and the size and type of reproductive features identified (*e.g.*, flower-  
116 ing buds, flowers, immature and mature fruits). Moreover, the model was more successful  
117 identifying and counting flowers than fruits, and was applied only to a single species with  
118 relatively little human-scored training data (21 herbarium specimens). The transferability  
119 of this model to other, more distantly related species was not examined.

120 Here, we leverage extensive data gathered using our crowd-sourcing platform *CrowdCurio*  
121 to develop and evaluate an instance segmentation approach using Mask R-CNN to train  
122 and test a model to identify and count phenological features of a larger number of species.  
123 Specifically, we investigated digitized specimens from six common spring-flowering herbs  
124 of the eastern United States: *Anemone canadensis*, *A. hepatica*, *A. quinquefolia*, *Trillium*

125 *erectum*, *T. grandiflorum*, and *T. undulatum*. As with any feature-detection model, accurate  
126 human-collected data are required to train, test, and refine these models. We thus gathered  
127 phenological data from these species using *CrowdCurio* to provide expert annotation data  
128 of buds, flowers, and fruits to train and test our models. Phenological data previously  
129 collected by non-expert citizen scientists was used to further evaluate the performance of  
130 these models (Park et al., 2019). Our goals were to: (1) determine how reliably we could  
131 localize and count these features; (2) determine the accuracy in automated scoring of different  
132 phenological features; and (iii) assess the transferability of models trained on one species to  
133 other, distantly related ones.

## 134 3 Materials and Methods

### 135 3.1 Dataset

136 Our experiments are based on a subset of the data used in Park et al. (2018, 2019) com-  
137 prising six species in two genera of common spring-flowering herbs, *Anemone* and *Trillium*.  
138 This subset includes 3073 specimens of: *Anemone canadensis* ( $N = 108$ ), *A. hepatica* ( $N =$   
139  $524$ ), *A. quinquefolia* ( $N = 686$ ), *Trillium erectum* ( $N = 862$ ), *T. grandiflorum* ( $N = 226$ ),  
140 and *T. undulatum* ( $N = 667$ ). Each specimen (herbarium sheet) was previously examined us-  
141 ing the *CrowdCurio–Thoreau’s Field Notes* platform by, on average, three citizen-scientists.  
142 For the purposes of this study, these specimens were additionally scored by expert botanists  
143 to provide the most accurate training and testing data possible. Annotators added markers  
144 in the center of each visible reproductive structure (bud, flower, or fruit), and determined  
145 its type, number, and spatial location. For our experiments, we randomly split this dataset  
146 into two parts: one ( $N = 2457$ ) for training the deep-learning models and one for testing  
147 them (*i.e.*, for evaluating their predictive performance;  $N = 615$ ).

148 Apart from the comparative experiment described in §4.5, only the annotations of experts  
149 were used to train and test the deep-learning models. We also only used the annotations

150 of one of the experts for each specimen (selected in a pre-defined order). The final dataset  
151 contains 7909 reproductive structures (6321 in the training set and 1588 in the test set) with  
152 the following imbalanced distribution: 492 buds (6.2%), 6119 flowers (77.4%), and 1298  
153 fruits (16.4%). Fruits were counted without any knowledge of seeds.

## 154 **3.2 Deep-learning framework**

155 Several deep-learning methods have been developed in recent years to count objects in  
156 images. One family of methods can be qualified as density-oriented methods (Zhang et al.,  
157 2015; Wang et al., 2015; Boominathan et al., 2016). They are usually based on U-Net  
158 architectures (Ronneberger et al., 2015) that are trained on annotations of object centers  
159 (indicated by dots) and predict density maps that are integrated to obtain counts. U-  
160 Net-based methods were developed originally for counting crowds and have been extended  
161 recently to counting cells (Falk et al., 2019) and animals (Arteta et al., 2016). The drawback  
162 of these methods is that they are better suited for cases where the density of objects in the  
163 image is high. This is not true in our case; the examined herbarium specimens averaged  $< 3$   
164 objects per specimen, even fewer if we consider buds, flowers, and fruits separately.

165 Another deep-learning method is “direct counting” (*a.k.a.* “glancing”), which trains the  
166 model with the true count on the global image (*e.g.*, Seguí et al., 2015). The main drawback  
167 of direct counting is that it cannot predict a count value that has no representative image  
168 in the training set. That is, the network is not really counting but only inferring the counts  
169 from the global content of the image. In preliminary experiments (not reported here), we  
170 found that direct-count methods tended to systematically under-estimate the true counts  
171 and have an unacceptably high variance.

172 The alternative method that we used in this study is to equate counting with object-  
173 detection; the counts of the object of interest is then equal to the sum up the number of  
174 detected objects. To detect buds, flowers, and fruits, we used Mask R-CNN, which is among  
175 the best-performing methods for instance segmentation tasks in computer vision (He et al.,

176 2017). We used Facebook’s implementation of Mask R-CNN (Massa and Girshick, 2018)  
177 using the PyTorch framework (Paszke et al., 2019) with a ResNet-50 architecture (He et al.,  
178 2016) as the backbone CNN and the Feature Pyramid Networks (Lin et al., 2017) for instance  
179 segmentation. To adapt this architecture to the data in our study (see previous section), we  
180 had to address the following methodological issues:

- 181 1. **Mask computation.** The training data expected by Mask R-CNN must consist of  
182 all the objects of interest visible in the training images, each object being detected  
183 individually and associated with a segmented region (encoded in the form of a binary  
184 mask). However, the data available for our study did not fully meet these conditions as  
185 the objects were detected only by dot markers (roughly in the centre of the reproduc-  
186 tive structure). From these dot markers, we generated dodecagons, such as the ones  
187 illustrated in Figure 1, which best covered the reproductive structures. To adapt the  
188 size of the dodecagons to buds, flowers, and fruits, we manually segmented five of each  
189 (selected at random from each genus) and calculated the average radius of the circle  
190 enclosing each structure.
- 191 2. **Input image size.** Images were resized to 1024 pixels (long edge)  $\times$  600 pixels  
192 (short edge). This guaranteed a sufficient number of pixels for the smallest dodecagons  
193 while maintaining a reasonable training time (5–10 hours per model) on a computer  
194 comparable to a mid-tier consumer device (*i.e.*, recent GPUs with  $\pm$ 12 GB of RAM).
- 195 3. **Anchor size.** Anchors are the raw rectangular regions of interest used by Mask R-  
196 CNN to select the candidate bounding boxes for mask detection. We designated their  
197 size so as to guarantee that all dodecagons had their entire area covered.

198 [Figure 1 about here.]

199 Figure 2 illustrates four example detections using Mask R-CNN: one with a perfectly  
200 predicted count, and three with over- or under-estimated counts. For each example, we



201 show (a part of) the original image, the ground-truth masks (computed from expert botanist  
202 input), and the automated detections computed by the deep-learning framework.

[Figure 2 about here.]

204 We then trained a set of models corresponding to three distinct scenarios to be evaluated:

- 205 1. **One model per species.** In this scenario, we trained one Mask R-CNN model for  
206 each species (*i.e.*, six models in total) to detect its buds, flowers, and fruits.
- 207 2. **One single model for all species.** In this scenario, we trained a single Mask R-CNN  
208 for all species and all types of reproductive structures (buds, flowers, fruits).
- 209 3. **Cross-species models.** Last, we assessed the transferability of models trained on  
210 some species to other ones. We trained three models on only two *Trillium* species:  
211 *i.e.*, one on *T. erectum* and *T. grandiflorum*, one on *T. erectum* and *T. undulatum*,  
212 and one on *T. undulatum* and *T. grandiflorum*. Each of these three models were then  
213 tested on the *Trillium* species not included in the training set.

### 214 3.3 Evaluation metrics and statistics

215 We evaluated the accuracy of the models in four ways:

- 216 1. **Counting error.** The counting error  $e_{i,k}$  for a specimen  $i$  and a given type of repro-  
217 ductive structure  $k \in \{bud, flower, fruit\}$  was defined as the difference between the  
218 true count and the predicted count:

$$e_{i,k} = \hat{c}_{i,k} - c_{i,k} \quad (1)$$

219 where  $c_{i,k}$  is the true count of reproductive structures of type  $k$  in specimen  $i$  and  $\hat{c}_{i,k}$   
220 is the predicted count. Note that the counting error can be positive or negative. A de-  
221 tailed description of the distribution of the counting error is provided using letter-value  
222 plots (Heike et al., 2017), which provide a more comprehensive view of the statistics  
223 through a larger number of quantiles.

- 224 2. **Mean Absolute Error (MAE).** The MAE measures the overall error by averaging  
225 the absolute value of the counting error of each specimen and each type of reproductive

226 structure:

$$MAE = \frac{1}{N} \sum_i \sum_k |e_{i,k}| \quad (2)$$

227 **3. Coefficient of determination ( $R^2$ ).** This statistic measures the amount of variance  
228 explained or accounted by the model:

$$R^2 = 1 - \frac{\sum_i (c_i - \hat{c}_i)^2}{\sum_i (c_i - \bar{c})^2} \quad (3)$$

229 where  $i$  indexes the observations and ranges from 1 to the total number of observations,  
230  $c_i$  is the observed count,  $\hat{c}_i$  is the predicted count, and  $\bar{c}$  is the mean of the observed  
231 counts.

232 **4. Predicted counts box-plots.** A detailed description of the distribution of the pre-  
233 dicted counts as a function of the true counts is provided using box-plots indicating  
234 median value, quartiles, variability outside quartiles, and outliers.

### 235 **3.4 Machine-learning vs. crowd-sourcing**

236 We compared the counts predicted by Mask R-CNN with those obtained when the re-  
237 productive structures on herbarium specimens were counted by crowd-sourcers (Park et al.,  
238 2019). The comparison was done on the intersection of the test sets of both studies (*i.e.*, on  
239 544 specimens, equal to 88% of the test set of previous experiments). These 544 specimens  
240 were annotated by 483 different annotators using Amazon Mechanical Turk. On average,  
241 each specimen was annotated by 2.5 different crowd-sourcers.

## 242 4 Results

### 243 4.1 A single model *vs.* species-specific models

244 The  $R^2$  value for the separate training model for each species and the single model for  
245 all species was 0.70 and 0.71, respectively. Thus, the single model for all species provides  
246 marginally better results while being simpler to implement and more scalable. As shown in  
247 Fig. 3, the main problem of single species training models is that they tend to over-predict  
248 the number of reproductive structures (number of positive errors  $>$  than number of negative  
249 errors; Fig. 3). The extreme outlier in Fig. 3 with a very high negative error resulted from  
250 a species being assessed by the model that had been misidentified in the collection.

251 The predictions of the single species training models were very accurate for  $\leq 3$  repro-  
252 ductive structures, whereas the single model for all species had high accuracy when  $\leq 4$   
253 reproductive structures were present (Fig. 4). The variance of the predicted counts was  
254 higher for specimens with more reproductive structures but the median predicted count  
255 equalled the actual count for  $\leq 7$  reproductive structures and the counting error (interquar-  
256 tile distance) was usually  $< 1$  structure. Specimens with  $> 8$  reproductive structures had  
257 larger errors but only accounted for 4.2% of the specimens examined.

258 [Figure 3 about here.]

259 [Figure 4 about here.]

### 260 4.2 Distinguishing reproductive structures

#### 261 4.2.1 Counting results

262 The overall numbers of detected reproductive structures and their relative proportions  
263 were very close to their actual values (Table 1). The Mean Absolute Error (MAE) was also  
264 quite low for all types of reproductive structures, but this is due in large part to the fact  
265 that the median number of structures per phase and specimen is low. The median number

266 of fruits and buds, in particular, is much lower than the median number of flowers. The  $R^2$   
267 values (Table 1) and the box plots of the predicted counts (Fig. 6) provide a more relevant  
268 comparison of the predictive performance for each type of structure. Flowers are the best  
269 detected structures ( $R^2 = 0.76$ ), followed by fruits ( $R^2 = 0.33$ ) and buds ( $R^2 = 0.12$ ). The  
270 lower performance for buds is due to several factors: (i) the lower number of samples in  
271 the training set—90.25% of specimens had no buds and 98.05% had  $<$  three buds, (ii) their  
272 smaller size and (iii), their visual appearance that is less distinctive than flowers or fruits.  
273 Fruits are affected by the same factors but to a lesser extent.

274 [Table 1 about here.]

275 [Figure 5 about here.]

276 [Figure 6 about here.]

#### 277 **4.2.2 Occurrence and dominance of reproductive structures**

278 Although the model was not developed or trained to directly detect presence or absence  
279 of each reproductive structure, we were able to extrapolate the presence of each feature  
280 and which feature was most frequent on a specimen (Table 2). The detection accuracy of  
281 buds, flowers, and fruits was  $> 87\%$  and the accuracy of determining relative abundance of a  
282 certain organ category (*e.g.*, number of flowers  $>$  number buds or fruits) was  $> 90\%$  (Table  
283 2). Confidence in this strong result should be tempered by the actual frequency of occurrence  
284 and dominance. Observed relative presences of buds, flowers, and fruits, and dominance of  
285 fruits *vs.* flowers all are quite disparate. Error rates (false negatives and positives) for these  
286 all are non-zero, but are lower in all presence and dominance categories (Table 2).

287 [Table 2 about here.]

### 288 4.3 Species-specific models

289 Overall, the reproductive structures were detected more accurately for *Trillium* species  
290 than *Anemone* species (Figs. 7 and 8). At the species-specific level, the  $R^2$  score was lowest  
291 for *A. canadensis* (0.01) which is the species with the least number of training samples (108  
292 specimens). The  $R^2$  score was better for the other species and increased with the number  
293 of training samples:  $R^2 = 0.51$  for *T. grandiflorum*,  $R^2 = 0.64$  for *A. hepatica*,  $R^2 = 0.76$   
294 for *T. undulatum*,  $R^2 = 0.85$  for *A. quinquefolia* and  $R^2 = 0.89$  for *T. erectum*. Counting  
295 errors rarely exceeded  $\pm 2$ , and the few strong outliers corresponded to very difficult cases or  
296 annotation errors. The median value of predicted counts was correct in almost all cases (Fig.  
297 7); exceptions were for *T. grandiflorum* specimens with four structures and *A. hepatica* with  
298 seven, both corresponding to instances involving a small number of specimens with large  
299 numbers of reproductive structures.

300 [Figure 7 about here.]

301 [Figure 8 about here.]

### 302 4.4 Model transferability

303 The aim of this experiment was to assess whether reproductive structures on one species  
304 could be estimated using a model trained on a different, related species. Unsurprisingly,  
305 estimation was less accurate when the target species was not represented in the training set  
306 (Figs. 9–11). However, it is still possible to count the reproductive structures of a target  
307 species based on a model trained on different species of the same genus (*i.e.*, without any  
308 specimen of the target species in the training data). The  $R^2$  score was higher for *T. erectum*  
309 ( $R^2=0.72$ ; Fig. 9) and *T. undulatum* ( $R^2=0.66$ ; Fig. 10), which are morphologically more  
310 similar to one another than either is to *T. grandiflorum* ( $R^2=0.02$ ; Fig. 11). Figures only  
311 show the results for *Trillium* but similar conclusions were obtained for *Anemone* ( $R_2$  scores

312 respectively equal to 0.75 for *A. quinquefolia*, 0.39 for *A. hepatica* and -0.39 for *A. canadensis*).

314

315 [Figure 9 about here.]

316 [Figure 10 about here.]

317 [Figure 11 about here.]

## 318 4.5 Machine-learning vs. crowd-sourcing

319 On average, the deep learning model had a significantly lower ( $P < 0.001$ ) MAE and  
320 better  $R^2$  score than any individual crowd-sourcer, but still an order of magnitude larger  
321 than the MAE of botanical experts (Table 3 and 4). Interestingly, we can observe that  
322 crowd-sourcers have a much harder time detecting buds than the Mask R-CNN model. The  
323 MAE obtained by averaging the counts of the different crowd-sourcers was only marginally  
324 higher than the MAE from Mask R-CNN ( $P = 0.3$ ). Note that a counts averaging strategy  
325 could also be used for the deep learning approach, *i.e.*, by averaging the scoring of several  
326 deep learning models. This technique is referred to as an *ensemble* of models in the machine  
327 learning community and is known to bring very significant improvements. The most simple  
328 yet very efficient method to build an ensemble is to train several times the same model but  
329 with a different random initialization of the parameters. Such strategy could be implemented  
330 in future work.

331 [Table 3 about here.]

332 [Table 4 about here.]



## 333 5 Discussion

334 Mask R-CNN models trained with human-annotated trait data were efficient and pro-  
335 duced robust results. Our models worked well for both identifying and counting phenological  
336 features, but accuracy differed for buds, flowers, and fruits. Automated counts using Mask  
337 R-CNN models were more accurate than counts made by crowd-sourcers but not those of  
338 botanical experts. Finally, the Mask R-CNN model could be transferred to other species  
339 after being trained with data from reasonably close phylogenetic relatives, with relatively  
340 small impacts on counting accuracy.

341 **Point masking with minor modification is efficient and produces robust re-**  
342 **sults.** Recent efforts by Goëau et al. (in press) to segment and count reproductive structures  
343 used training data collected by botanical experts from 21 herbarium specimens of a single  
344 species (*Streptanthus tortuosus*). In our work, we applied Mask R-CNN to segment and count  
345 reproductive structures of six species, belonging to two different genera; accurate training  
346 data were derived from both botanical experts and crowd-sourcers using the *CrowdCurio* in-  
347 terface (Willis et al., 2017). Although Goëau et al. (in press) found that training data from  
348 point masks, like those generated from *CrowdCurio*, produced less accurate results than those  
349 derived from fully masked training data, obtaining the latter is time intensive and difficult  
350 to scale to large numbers of specimens. Whereas Goëau et al. (in press) produced three type  
351 of training data, “point masks” (produced from a  $3 \times 3$ -pixel box around a manual point  
352 marker); (ii) “partial masks” (extensions of point masks to include partial segmentation us-  
353 ing the Otsu segmentation method (Otsu, 1979); and (iii) manually produced “full masks” of  
354 each reproductive structure, we only used modified partial masks (derived from point mark-  
355 ers) with Mask R-CNN. These modified partial masks were scaled to the size of reproductive  
356 structures for each species and yielded high accuracy and efficiency for phenophase detection  
357 and counting. The scaling of our modified partial masks combined with the approximately  
358 circular shapes of the reproductive structures we studied likely led to the success of our ap-  
359 proach. Our two-step workflow integrating expert-scored and crowd-sourced citizen science

360 data with automated machine-learning models also is less time-intensive and more scalable  
361 than a workflow requiring detailed polygon masks of structures for training.

362 **Feature detection and counting accuracy is high across all phenological fea-**  
363 **tures.** Lorieul et al. (2019) were the first to apply machine-learning to detect phenophases  
364 and developed a presence-absence model that could identify reproductive specimens with  
365  $\approx 96\%$  accuracy. Their model was less accurate in detecting flowers or fruits ( $\approx 85\%$  and  
366  $\approx 80\%$  accuracy, respectively), and they did not consider buds. In contrast, we used Mask  
367 R-CNN to accurately identify the presence of each of the three reproductive stages (buds,  
368 flowers, or fruits) with  $\geq 87\%$  accuracy (Table 2). Moreover, a single globally-trained model  
369 was more efficient and had greater accuracy than multiple species-specific models (Figs. 7  
370 and 8). This points towards the possibility of developing a more streamlined workflow to  
371 accurately score phenophases of many different species simultaneously.

372 We also successfully estimated the relative abundance of each reproductive structure  
373 on a specimen with  $\geq 90\%$  accuracy (Table 2). Herbarium specimens can vary greatly  
374 in phenological state. Because different reproductive organs can co-exist at various times  
375 through plant development (and may not all be represented simultaneously on herbarium  
376 sheets), simply quantifying presence or absence of phenological structures limits inference  
377 about phenological state. In this regard, the Mask R-CNN model performed better on *Tril-*  
378 *lium*—with its large flowers and fruits, generally borne singly, and suspended on an elongate  
379 stalk—than on *Anemone*—with its small clusters of flowers on shorter stalks that are often  
380 pressed against a background of clustered leaves. The combination of smaller flowers, more  
381 complex morphology, and background “noise” on *Anemone* specimens (*e.g.*, overlapping  
382 structures) likely made both model training and phenophase detection more prone to error.  
383 This result supports the recent hypotheses that successful application of machine-learning to  
384 phenophase assessment will be dependent on species-specific morphological details (Goëau  
385 et al., in press). Along these lines, plant morphological trait databases could help facilitate  
386 the identification of suitable taxa to be analysed with machine-learning methods.

387 Precise quantification of different reproductive structures, as demonstrated here, allows  
388 the determination of finer-scale phenophases (*e.g.*, early flowering, peak flowering, peak  
389 fruiting). For this exercise, the lowest mean absolute error (MAE) was for bud counts, most  
390 likely due to the morphological consistency of buds and their rarity on specimens (Table  
391 1). In contrast, MAE for counting flowers was significantly worse than for buds or fruits.  
392 We attribute this result to the greater number of flowers, ontogenetic variability in floral  
393 morphology, and variation in appearance of dried, pressed specimens.

394 Variation in appearance of reproductive features among dried and pressed specimens of a  
395 single species also could add complexity to automated detection of phenological features and  
396 merits further investigation. Perhaps more consequentially, large variation in the number of  
397 reproductive organs resulted in unbalanced datasets (Table 1). Numerous data augmentation  
398 approaches can be implemented to improve comparisons and model selection for such data  
399 sets (*e.g.*, Tyagi and Mittal, 2020), but these approaches have been used more frequently  
400 in classification or semantic segmentation (Chan et al., 2019) than in instance segmentation  
401 approaches such as we used here. Developing data augmentation approaches for instance  
402 segmentation would be a useful direction for future research. But even if collectors collect  
403 more flowering than non-flowering specimens, estimating the quantity of buds, flowers and  
404 fruits on any specimen is more informative than recording only their presence or absence.

405 **Botanical experts perform better than the model.** When considered in aggregate,  
406 the MAE for segmenting and counting all three phenophases using Mask R-CNN was lower  
407 than that of crowd-sourcers but still an order of magnitude higher than that of botanical  
408 experts (Tables 2, 3). This result reinforces the suggestion that abundant and reliable  
409 expert data are essential for properly training and testing machine learning models (Brodrick  
410 et al., 2019). Additionally, it was evident in some cases that the precise detection of the  
411 phenological feature was quite inaccurate (Figure 2).

412 **Machines can apply learning from one species to another, but success is vari-**  
413 **able.** For the first time to our knowledge, we have demonstrated that training data from

414 related taxa can be used to detect and count phenological features of a species not rep-  
415 resented in the training set (Figs. 9–11). We limit our discussion of transferability here  
416 to species of *Trillium* owing to the ease of detecting and counting phenological features in  
417 this genus. Though in some cases species-specific models were highly transferable, model  
418 transferability varied greatly. For example, training on *T. undulatum* and testing on *T.*  
419 *erectum* (and vice-versa) was more accurate than when Mask R-CNN models trained with  
420 data from either of these species was applied to *T. grandiflorum*. *Trillium undulatum* and  
421 *T. erectum* are more similar morphologically than either is to *T. grandiflorum*, suggesting  
422 that morphological similarity may be a better guide for transferability success than phyloge-  
423 netic relatedness (see Farmer and Schilling, 2002, for phylogenetic relationships of *Trillium*).  
424 This conclusion implies that transferability may be particularly challenging for clades that  
425 exhibit high morphological diversity and disparity among close relatives. The relationship  
426 between phylogenetic relatedness, morphological diversity, and model transferability should  
427 be investigated in future studies. The assessment of the sizes of the reproductive struc-  
428 tures that could be captured by this type of approach should also be analysed, to facilitate  
429 transferability.

430 **Future directions.** The presence of reproductive structures has been determined only  
431 infrequently during large-scale digitization and transcription efforts by the natural-history  
432 museums that generate this content. However, interest is growing rapidly in using herbar-  
433 ium specimens for investigating historical changes in phenology and other ecological traits  
434 and processes. Our results have demonstrated success in automating the collection of large  
435 amounts of ecologically-relevant data from herbarium specimens. Together with controlled  
436 vocabularies and ontologies that are being developed to standardize these efforts (Yost et al.,  
437 2018), our two-stage workflow has promise for automating and harvesting phenological data  
438 from images in large virtual herbaria. In the long term, we would like to use the *CrowdCurio*  
439 workflow to generate reliable human-annotated data to further refine automated models for  
440 detecting phenological responses to climatic change from herbarium specimens across diverse

441 clades and geographies. Finally, our results documenting transferability of machine-learning  
442 models from one species to another are preliminary, but promising. Although our univer-  
443 sal model trained on all taxa performed better than our individual, species-specific models,  
444 there may be better ways to guide these efforts. For example, a hierarchy of individual  
445 models could yield more accurate results. These hierarchies might be phylogenetically or-  
446 ganized (*e.g.*, taxonomically by order, family, genus), leveraging information about shared  
447 morphologies common to related taxa and further governed by a set of rules that parse new  
448 specimens for phenophase detection based on their known taxonomic affinities (*e.g.*, by gen-  
449 era). Similar approaches are already being applied today by corporations like Tesla Motors.  
450 Their automated driving suite uses different models for vehicle path prediction versus vehicle  
451 detection (Karpathy et al., 2014; Tesla, 2019).

## 452 **Conflict of Interest Statement**

453 The authors declare that the research was conducted in the absence of any commercial  
454 or financial relationships that could be construed as a potential conflict of interest.

455

## 456 **Author Contributions**

457 CCD conceived the idea for the study; CCD, DT, IB, and DSP ran a pilot feasibility  
458 study to motivate the current project; DSP and GML generated, organized, and assembled  
459 expert and non-expert crowd-sourced data to train the Mask R-CNN model; JX re-coded  
460 *CrowdCurio* for these experiments; JC, AJ, and PB conducted the analyses; CCD, AJ,  
461 PB, JC, DSP, and AME interpreted the results; CCD wrote the first draft of the Abstract,  
462 Introduction, and Discussion; JC, AJ, and PB wrote the first draft of the Methods and  
463 Results; all co-authors revised and edited the final draft.

## 464 **Funding**

465 This study was funded as part of the New England Vascular Plant Project to CCD  
466 (National Science Foundation (NSF)-DBI: EF1208835), NSF-DEB 1754584 to CCD, DSP,  
467 and AME, and by a Climate Change Solutions Fund to CCD and collaborating PIs in  
468 Brazil (R. Forzza, L. Freitas, C. El-Hani, GML, P. Rocha, N. Roque, and A. Amorimm)  
469 from Harvard University. AME's participation in this project was supported by Harvard  
470 Forest. DSP's contribution was supported by NSF-DBI: EF1208835. IB's contribution was  
471 supported by a NSF Postdoctoral Research Fellowship in Biology (NSF-DBI-1711936). The  
472 authors would like to thank the French Agence Nationale de la Recherche (ANR), which has  
473 supported this research (ANR-17-ROSE-0003).

## 474 **Acknowledgments**

475 The authors are grateful to Inria Sophia Antipolis - Méditerranée "NEF" computation  
476 platform for providing resources and support. The authors acknowledge iDigBio's Phenology  
477 and Machine Learning Workshop (1/2019), which helped to stimulate this collaboration.  
478 The authors are grateful for the efforts of citizen scientists that helped generate data and  
479 the many collectors and curators of plant specimens that have made this research possible.

## 480 **Supplemental Data**

## 481 **Data Availability Statement**

482 The datasets generated and analyzed for this study can be found in the Harvard Forest  
483 Data Archive <https://harvardforest.fas.harvard.edu/data-archive>, dataset HF-3xx  
484 and the Environmental Data Initiative doi:<https://dx.doi.org/doi-to-come>.

## 485 Literature Cited

- 486 Arteta, C., V. Lempitsky, and A. Zisserman, 2016. Counting in the wild. Pages 483–498 *in*  
487 European Conference on Computer Vision. Springer.
- 488 Boominathan, L., S. S. Kruthiventi, and R. V. Babu, 2016. Crowdnet: A deep convolu-  
489 tional network for dense crowd counting. Pages 640–644 *in* Proceedings of the 24th ACM  
490 International Conference on Multimedia.
- 491 Brodrick, P. G., A. B. Davies, and G. P. Asner. 2019. Uncovering ecological patterns with  
492 convolutional neural networks. *Trends in Ecology & Evolution* .
- 493 Chan, R., M. Rottmann, F. Hüger, P. Schlicht, and H. Gottschalk. 2019. Application of  
494 decision rules for handling class imbalance in semantic segmentation .
- 495 Davis, C. C., C. G. Willis, B. Connolly, C. Kelly, and A. M. Ellison. 2015. Herbarium records  
496 are reliable sources of phenological change driven by climate and provide novel insights into  
497 species’ phenological cueing mechanisms. *American Journal of Botany* **102**:1599–1609.
- 498 Falk, T., D. Mai, R. Bensch, Ö. Çiçek, A. Abdulkadir, Y. Marrakchi, A. Böhm, J. Deubner,  
499 Z. Jäckel, K. Seiwald, et al. 2019. U-Net: deep learning for cell counting, detection, and  
500 morphometry. *Nature Methods* **16**:67–70.
- 501 Farmer, S., and E. Schilling. 2002. Phylogenetic analyses of Trilliaceae based on morpholog-  
502 ical and molecular data. *Systematic Botany* **27**:674–692.
- 503 Goëau, H., A. Mora-Fallas, J. Champ, N. Love, S. J. Mazer, E. Mata-Montero, and P. Joly,  
504 A.and Bonnet. *in press*. New fine-grained method for automated visual analysis of herbar-  
505 ium specimens: a case study for phenological data extraction. *Applications in Plant*  
506 *Sciences* .
- 507 He, K., G. Gkioxari, P. Dollár, and R. Girshick, 2017. Mask R-CNN. Pages 2961–2969 *in*  
508 Proceedings of the IEEE International Conference on Computer Vision.

- 509 He, K., X. Zhang, S. Ren, and J. Sun, 2016. Deep residual learning for image recognition.  
510 Pages 770–778 *in* Proceedings of the IEEE Conference on Computer Vision and Pattern  
511 Recognition.
- 512 Hedrick, B. P., J. M. Heberling, E. K. Meineke, K. G. Turner, C. J. Grassa, D. S. Park,  
513 J. Kennedy, J. A. Clarke, J. A. Cook, D. C. Blackburn, S. V. Edwards, and C. C. Davis.  
514 2020. Digitization and the future of natural history collections. *BioScience* **70**:243–251.
- 515 Heike, H., H. Wickham, and K. Kafadar. 2017. Letter-Value Plots: Boxplots for Large Data.  
516 *Journal of Computational and Graphical Statistics* **26**:469–477.
- 517 Karpathy, A., G. Toderici, S. Shetty, T. Leung, R. Sukthankar, and F.-F. Li, 2014. Large-  
518 scale video classification with convolutional neural networks. Pages 1725–1732 *in* 2014  
519 IEEE Conference on Computer Vision and Pattern Recognition.
- 520 Lin, T.-Y., P. Dollár, R. Girshick, K. He, B. Hariharan, and S. Belongie, 2017. Feature  
521 pyramid networks for object detection. Pages 2117–2125 *in* Proceedings of the IEEE  
522 Conference on Computer Vision and Pattern Recognition.
- 523 Lorieul, T., K. D. Pearson, E. R. Ellwood, H. Goëau, J.-F. Molino, P. W. Sweeney, J. M.  
524 Yost, J. Sachs, E. Mata-Montero, G. Nelson, et al. 2019. Toward a large-scale and  
525 deep phenological stage annotation of herbarium specimens: Case studies from temperate,  
526 tropical, and equatorial floras. *Applications in Plant Sciences* **7**:e01233.
- 527 Love, N. L. R., I. W. Park, and S. J. Mazer. 2019. A new phenological metric for use in  
528 pheno-climatic models: A case study using herbarium specimens of *Streptanthus tortuosus*.  
529 *Applications in Plant Sciences* **7**:e11276.
- 530 Massa, F., and R. Girshick, 2018. maskrcnn-benchmark: Fast, modular reference implemen-  
531 tation of Instance Segmentation and Object Detection algorithms in PyTorch.



- 532 Meineke, E. K., T. J. Davies, B. H. Daru, and C. C. Davis. 2019. Biological collections for  
533 understanding biodiversity in the Anthropocene. *Philosophical Transactions of the Royal*  
534 *Society of London B* **374**:20170386.
- 535 Meineke, E. K., C. C. Davis, and T. J. Davies. 2018. The unrealized potential of herbaria  
536 for global change biology. *Ecological Monographs* **88**:505–525.
- 537 Miller-Rushing, A. J., R. B. Primack, D. Primack, and S. Mukunda. 2006. Photographs  
538 and herbarium specimens as tools to document phenological changes in response to global  
539 warming. *American Journal of Botany* **93**:1667–1674.
- 540 Nelson, G., and S. Ellis. 2019. The history and impact of digitization and digital data  
541 mobilization on biodiversity research. *Philosophical Transactions of the Royal Society B*  
542 **374**:20170391.
- 543 Otsu, N. 1979. A threshold selection method from gray-level histograms. *IEEE transactions*  
544 *on systems, man, and cybernetics* **9**:62–66.
- 545 Park, D., A. Williams, E. Law, A. Ellison, and C. Davis. 2018. Assessing plant phenological  
546 patterns in the eastern United States over the last 120 years .
- 547 Park, D. S., I. Breckheimer, A. C. Williams, E. Law, A. M. Ellison, and C. C. Davis. 2019.  
548 Herbarium specimens reveal substantial and unexpected variation in phenological sensi-  
549 tivity across the eastern United States. *Philosophical Transactions of the Royal Society B*  
550 **374**:20170394.
- 551 Paszke, A., S. Gross, F. Massa, A. Lerer, J. Bradbury, G. Chanan, T. Killeen, Z. Lin,  
552 N. Gimelshein, L. Antiga, et al., 2019. PyTorch: An imperative style, high-performance  
553 deep learning library. Pages 8024–8035 *in* *Advances in Neural Information Processing*  
554 *Systems*.

- 555 Pearson, K. D. 2019. A new method and insights for estimating phenological events from  
556 herbarium specimens. *Applications in Plant Sciences* **7**:e01224.
- 557 Pearson, K. D., G. Nelson, M. F. J. Aronson, P. Bonnet, L. Brenskelle, C. C. Davis, E. G.  
558 Denny, E. R. Ellwood, H. Goëau, J. M. Heberling, A. Joly, T. Lorieul, S. J. Mazer, E. K.  
559 Meineke, B. J. Stucky, P. Sweeney, A. E. White, and P. S. Soltis. 2020. Machine learning  
560 using digitized herbarium specimens to advance phenological research. *BioScience* pages  
561 XX–YY.
- 562 Primack, D., C. Imbres, R. B. Primack, A. J. Miller-Rushing, and P. Del Tredici. 2004.  
563 Herbarium specimens demonstrate earlier flowering times in response to warming in  
564 Boston. *American Journal of Botany* **91**:1260–1264.
- 565 Ronneberger, O., P. Fischer, and T. Brox, 2015. U-net: Convolutional networks for biomed-  
566 ical image segmentation. Pages 234–241 *in* International Conference on Medical Image  
567 Computing and Computer-assisted Intervention. Springer.
- 568 Seguí, S., O. Pujol, and J. Vitria, 2015. Learning to count with deep object features.  
569 Pages 90–96 *in* Proceedings of the IEEE Conference on Computer Vision and Pattern  
570 Recognition Workshops.
- 571 Sweeney, P. W., B. Starly, P. J. Morris, Y. Xu, A. Jones, S. Radhakrishnan, C. J. Grassa,  
572 and C. C. Davis. 2018. Large-scale digitization of herbarium specimens: Development and  
573 usage of an automated, high-throughput conveyor system. *Taxon* **67**:165–178.
- 574 Tesla, 2019. Tesla Autonomy Day 2019 - Full Self-Driving Autopilot - Complete Investor  
575 Conference Event.
- 576 Thiers, B., 2017. Index Herbariorum. URL <http://sweetgum.nybg.org/ih>.
- 577 Tyagi, S., and S. Mittal, 2020. Sampling approaches for imbalanced data classification

- 578 problem in machine learning. Pages 209–221 *in* Proceedings of ICRIC 2019. Lecture  
579 Notes in Electrical Engineering, vol 597. Springer, Cham, Switzerland.
- 580 Wang, C., H. Zhang, L. Yang, S. Liu, and X. Cao, 2015. Deep people counting in extremely  
581 dense crowds. Pages 1299–1302 *in* Proceedings of the 23rd ACM International Conference  
582 on Multimedia.
- 583 Williams, A. C., J. Goh, C. G. Willis, A. M. Ellison, J. H. Brusuelas, C. C. Davis, and  
584 E. Law, 2017. Deja vu: Characterizing worker reliability using task consistency. *in* Fifth  
585 AAAI Conference on Human Computation and Crowdsourcing.
- 586 Willis, C. G., E. R. Ellwood, R. B. Primack, C. C. Davis, K. D. Pearson, A. S. Gallinat,  
587 J. M. Yost, G. Nelson, S. J. Mazer, N. L. Rossington, et al. 2017. Old plants, new  
588 tricks: phenological research using herbarium specimens. *Trends in Ecology & Evolution*  
589 **32**:531–546.
- 590 Wolkovich, E. M., B. I. Cook, and T. J. Davies. 2014. Progress towards an interdisciplinary  
591 science of plant phenology: building predictions across space, time and species diversity.  
592 *New Phytologist* **201**:1156–1162.
- 593 Yost, J. M., P. W. Sweeney, E. Gilbert, G. Nelson, R. Guralnick, A. S. Gallinat, E. R. Ell-  
594 wood, N. Rossington, C. G. Willis, S. D. Blum, R. L. Walls, E. M. Haston, M. W. Denslow,  
595 C. M. Zohner, A. B. Morris, B. J. Stucky, J. R. Carter, D. G. Baxter, K. Bolmgren, E. G.  
596 Denny, E. Dean, K. D. Pearson, C. C. Davis, B. D. Mishler, P. S. Soltis, and S. J. Mazer.  
597 2018. Digitization protocol for scoring reproductive phenology from herbarium specimens  
598 of seed plants. *Applications in Plant Sciences* **6**:e1022.
- 599 Zhang, C., H. Li, X. Wang, and X. Yang, 2015. Cross-scene crowd counting via deep  
600 convolutional neural networks. Pages 833–841 *in* Proceedings of the IEEE Conference on  
601 Computer Vision and Pattern Recognition.

Table 1: Predicted and true counts (percent of specimens in parentheses) of buds, flowers, and fruits for all specimens pooled.

|                                | Buds             | Flowers            | Fruits            | All         |
|--------------------------------|------------------|--------------------|-------------------|-------------|
| True number of structures      | <b>107</b> (6.7) | <b>1241</b> (78.1) | <b>240</b> (15.1) | 1588        |
| Predicted number of structures | <b>109</b> (6.1) | <b>1431</b> (80.0) | <b>248</b> (13.9) | 1788        |
| MAE                            | <b>0.20</b>      | <b>0.51</b>        | <b>0.27</b>       | <b>0.33</b> |
| $R^2$                          | <b>0.12</b>      | <b>0.76</b>        | <b>0.33</b>       | <b>0.71</b> |

Table 2: Accuracy of detection and relative dominance of buds, flowers, and fruits (data pooled for all species). Values are percentages.

|                                       | Buds         | Flowers      | Fruits       | Flowers $\geq$ Buds | Fruits $\geq$ Flowers |
|---------------------------------------|--------------|--------------|--------------|---------------------|-----------------------|
| <b>Observed</b>                       | 9.75         | 82.92        | 20.00        | 96.09               | 21.13                 |
| True positives (correctly detected)   | 51.66        | 97.25        | 78.86        | 98.98               | 76.15                 |
| True negatives (correctly undetected) | 91.89        | 49.52        | 89.83        | 8.33                | 95.65                 |
| False positives                       | 8.10         | 50.47        | 10.16        | 91.66               | 3.71                  |
| False negatives                       | 48.33        | 2.74         | 21.13        | 1.01                | 23.84                 |
| <b>Overall Accuracy</b>               | <b>87.97</b> | <b>89.11</b> | <b>87.64</b> | <b>95.44</b>        | <b>92.03</b>          |

Table 3: Comparison of the counting error resulting from crowd-sourcing, deep learning and expert annotation – performance is measured by the Mean Absolute Error (MAE).

|                                              | Buds         | Flowers      | Fruits       | All          |
|----------------------------------------------|--------------|--------------|--------------|--------------|
| Experts                                      | 0.009        | 0.027        | 0.073        | 0.036        |
| Crowd-sourcing (isolated annotator)          | 0.526        | 0.487        | 0.314        | 0.442        |
| Crowd-sourcing (average over all annotators) | 0.418        | 0.405        | 0.243        | 0.355        |
| Deep learning (model trained on all species) | <b>0.201</b> | <b>0.507</b> | <b>0.266</b> | <b>0.325</b> |

Table 4: Comparison of the counting error resulting from crowd-sourcing, deep learning and expert annotation – performance is measured by  $R^2$  score.

|                                              | Buds         | Flowers      | Fruits       | All          |
|----------------------------------------------|--------------|--------------|--------------|--------------|
| Experts                                      | 0.989        | 0.996        | 0.961        | 0.990        |
| Crowd-sourcing (isolated annotator)          | -2.969       | 0.758        | 0.306        | 0.555        |
| Crowd-sourcing (average over all annotators) | -1.527       | 0.828        | 0.401        | 0.686        |
| Deep learning (model trained on all species) | <b>0.141</b> | <b>0.750</b> | <b>0.329</b> | <b>0.707</b> |

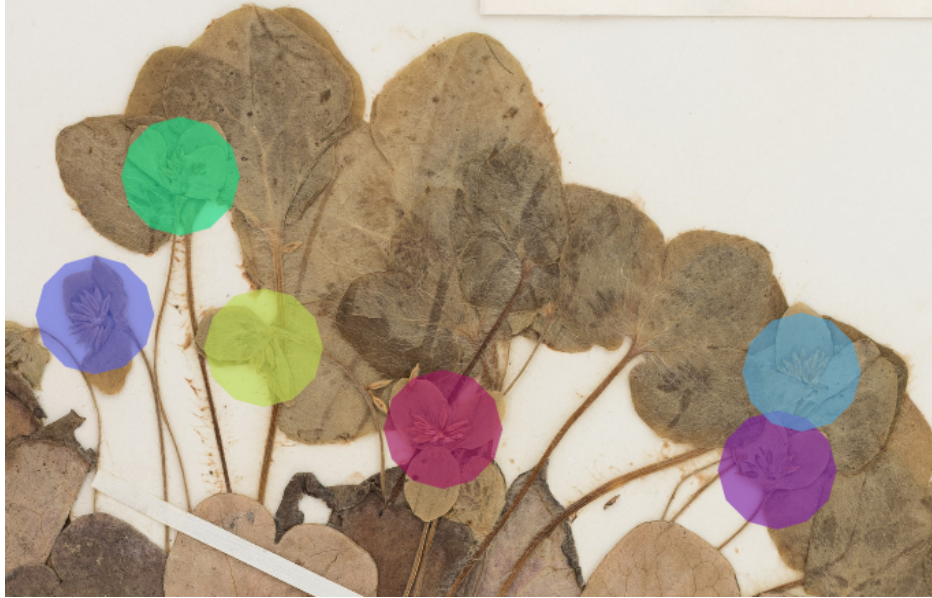

Figure 1: Example of a specimen of the training set containing six reproductive structures (flowers) marked by dodecagons.



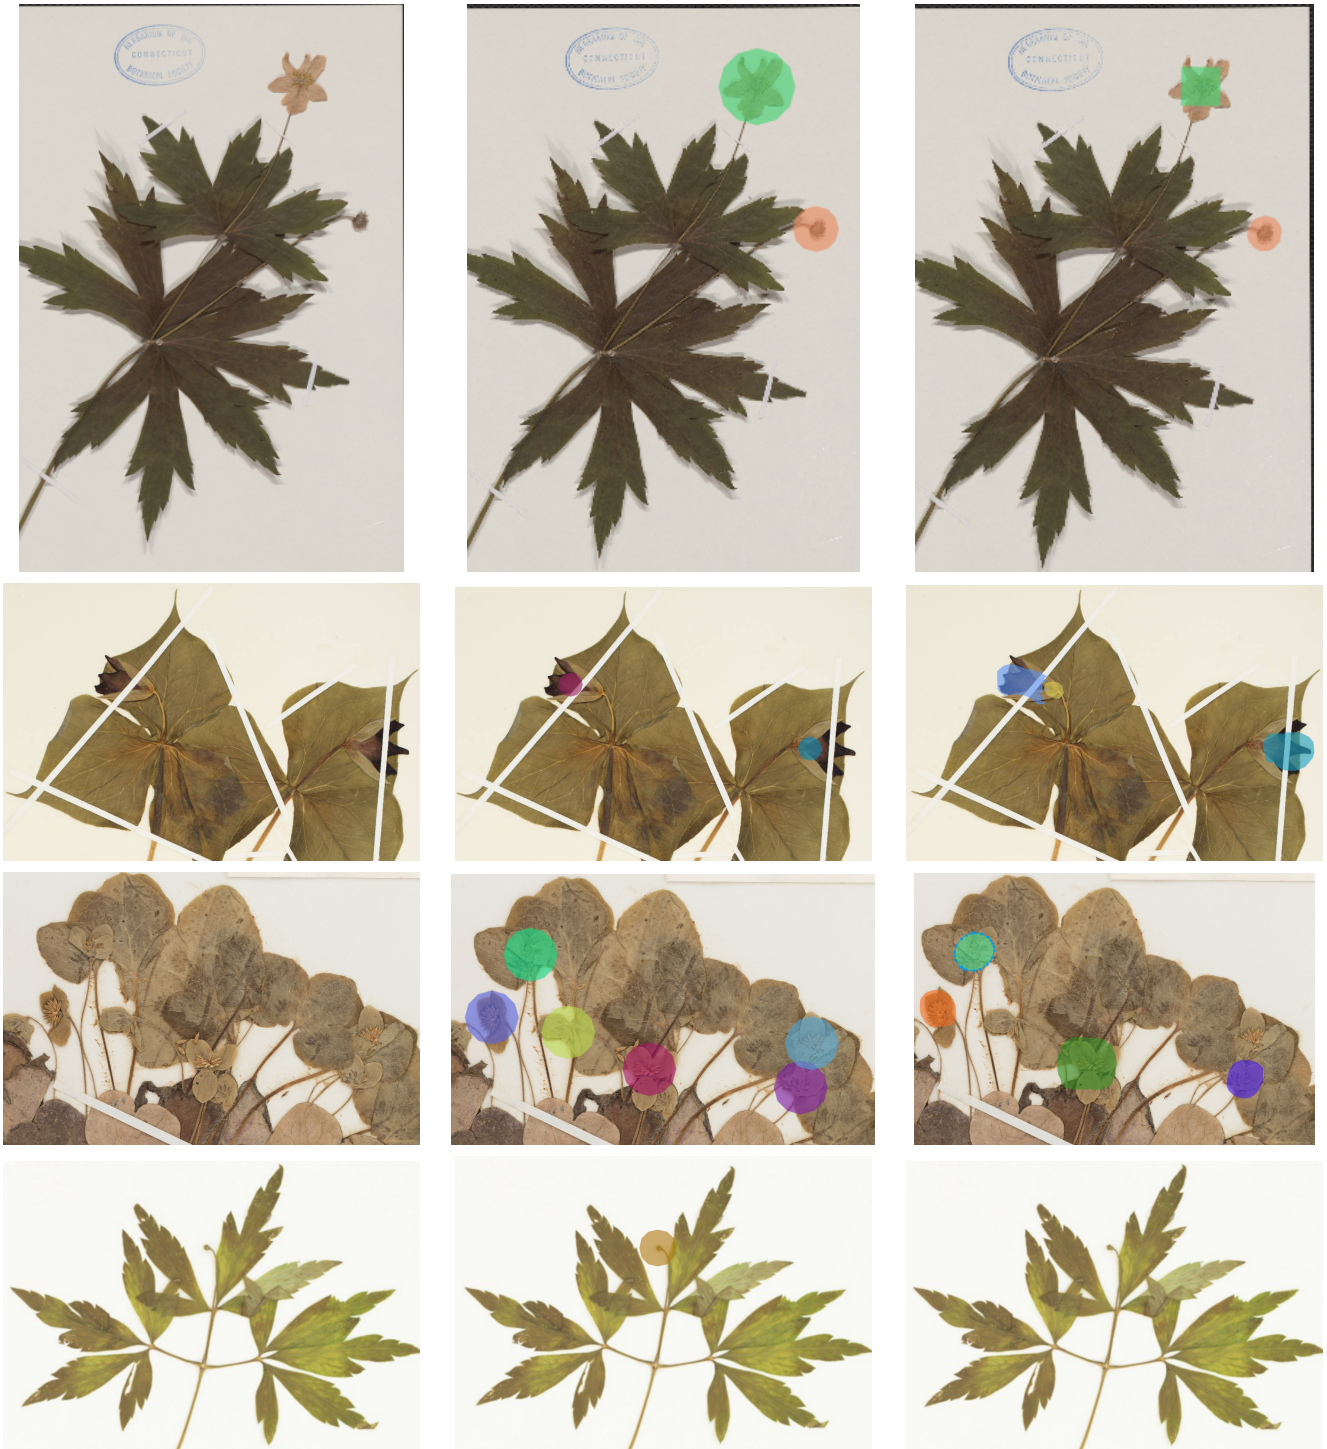

Figure 2: Examples of detection (colors do not have a particular meaning) - **Left Column:** original image; **Center Column:** ground-truth markers; **Right Column:** automatically detected masks. The first row corresponds to a typical case with a perfect count. The second row corresponds to a case of over-estimated counts (one of the flowers was detected as two flowers). The last two rows correspond to under-estimated counts (some structures were missed or aggregated as one).

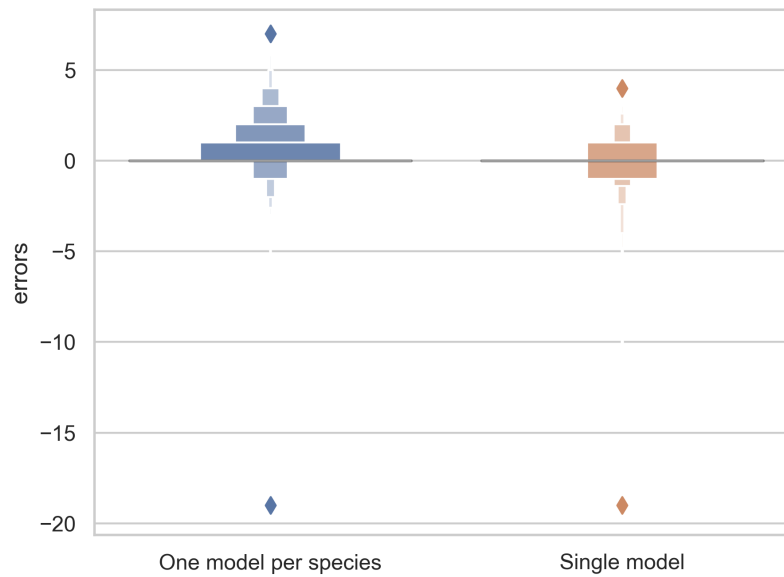

Figure 3: Letter-value plot of the counting error for the two training strategies: one model per species *vs.* one single model for all species.

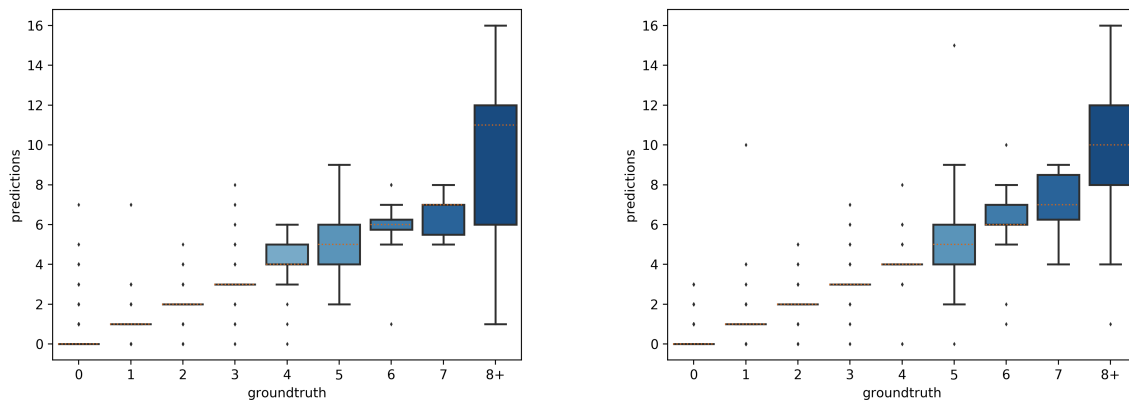

Figure 4: Box-plots of the predicted *vs.* expected counts for the two training strategies: **(Left)** separate training models for each species, **(Right)** single training model for all species.

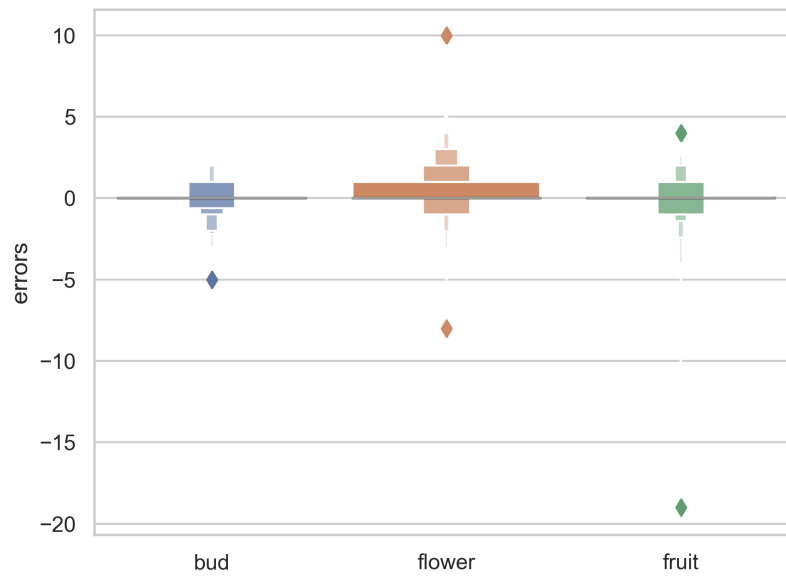

Figure 5: Letter-value plot of the counting error for each type of reproductive structure.

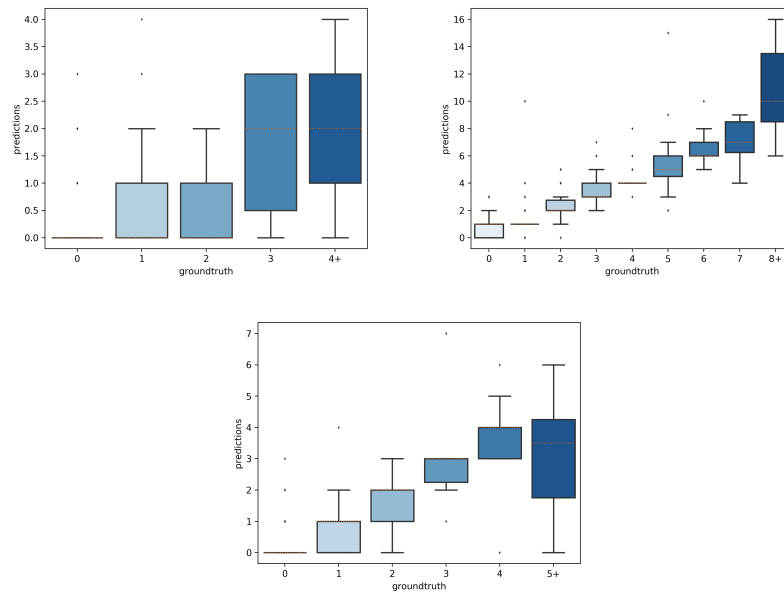

Figure 6: Box-plots of the predicted *vs.* expected counts for each type of reproductive structure. From left to right: buds, flowers, fruits.

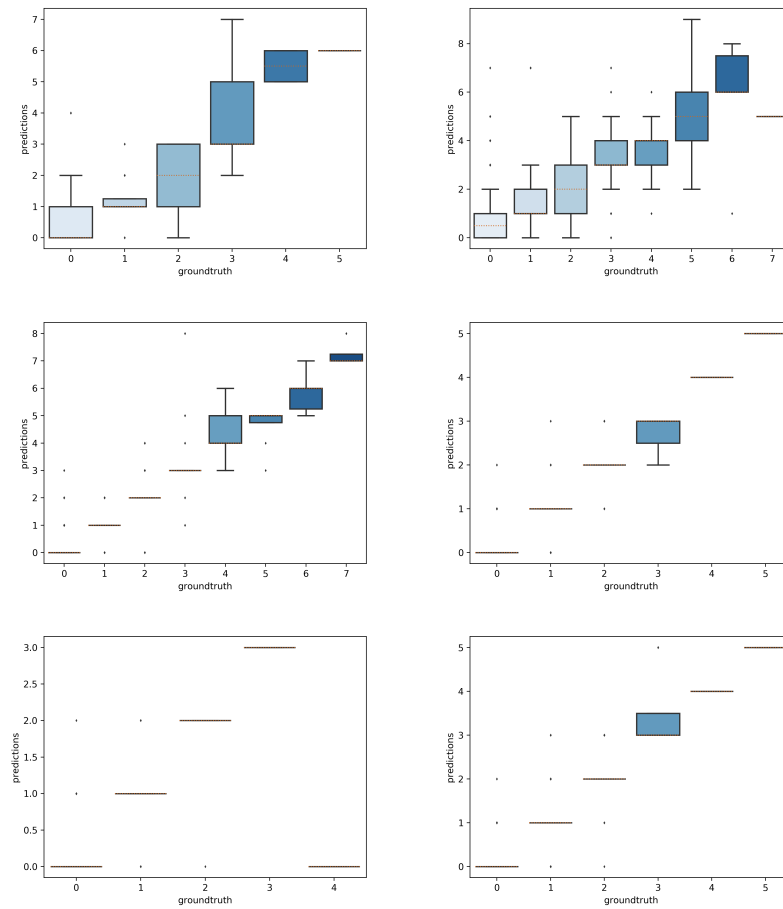

Figure 7: Boxplot of the predicted counts vs. expected counts for each species. (A): *Anemone canadensis*; (B): *A. hepatica*; (C): *A. quinquefolia*; (D): *Trillium erectum*; (E): *T. grandiflorum*; (F): *T. undulatum*.

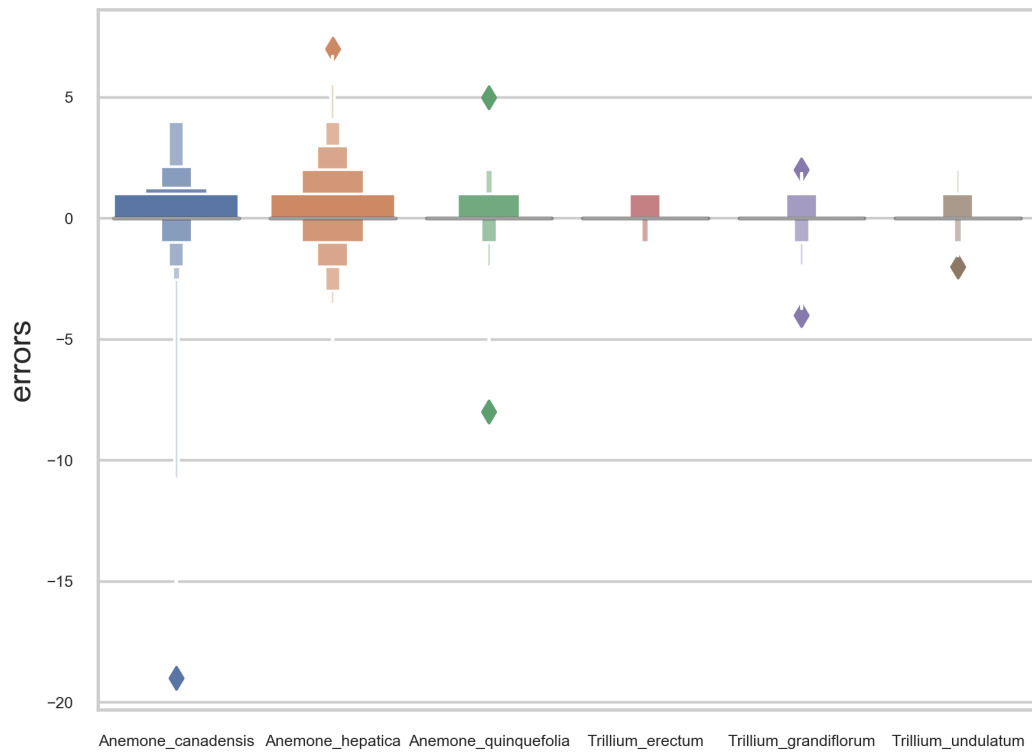

Figure 8: Letter-value plot of the counting error for each species.

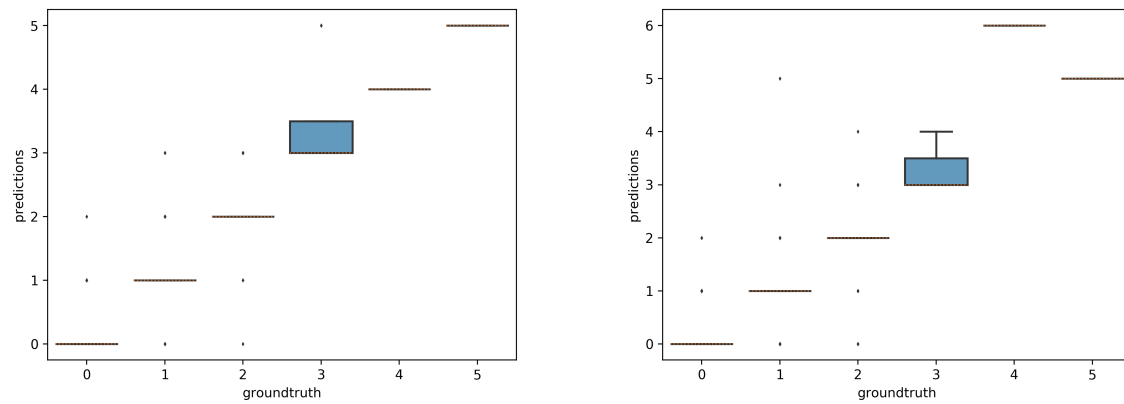

Figure 9: Box-plots of the predicted counts *vs.* expected counts for *Trillium erectum*. Left: Model trained on *T. erectum* data; Right: model trained on *T. undulatum* and *T. grandiflorum*.



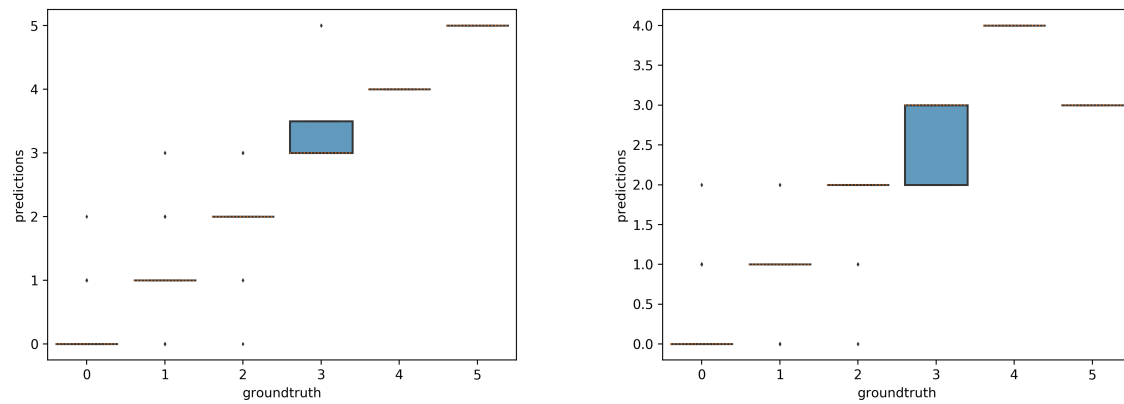

Figure 10: Box-plots of predicted counts *vs.* observed counts for *Trillium undulatum*. Left: Model trained on *T. undulatum* data; Right: model trained on *T. erectum* and *T. grandiflorum*.

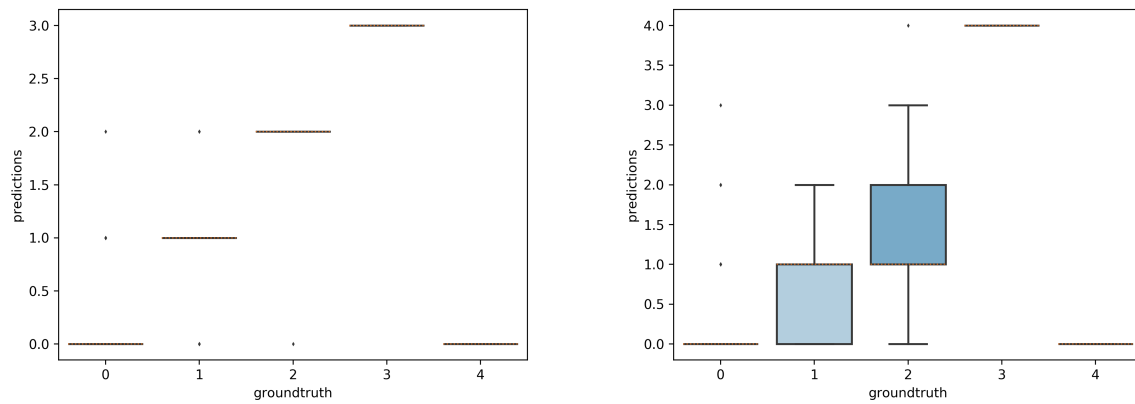

Figure 11: Box-plots of predicted counts *vs.* expected counts for *Trillium grandiflorum*. Left: Model trained on *T. grandiflorum* data; Right: model trained on *T. erectum* and *T. undulatum*
